# Supplementary material for: In Vitro Antibacterial Activity of Ozonated Olive Oil against Bacteria of Various Antimicrobial Resistance Profiles Isolated from Wounds of Companion Animals
Source: MDPI journal article supplement (doi:10.3390/ijms25063557), 2024-03-21
Supplement: s1 [file s1]

**Table S1.** List of bacteria species used in the experiment.

| Species                                | Total (n=101) |
|----------------------------------------|---------------|
| Gram-negative                          | 44 (43.56)    |
| <i>Acinetobacter calcoaceticus</i>     | 1             |
| <i>Acinetobacter pittii</i>            | 1             |
| <i>Acinetobacter ursingii</i>          | 3             |
| <i>Aeromonas media</i>                 | 1             |
| <i>Brevundimonas diminuta</i>          | 1             |
| <i>Citrobacter freundii</i>            | 2             |
| <i>Enterobacter hormaechei</i>         | 2             |
| <i>Escherichia coli</i>                | 11            |
| <i>Klebsiella pneumoniae</i>           | 1             |
| <i>Kocuria rhizophilia</i>             | 1             |
| <i>Leclercia adecarboxylata</i>        | 1             |
| <i>Pantoea agglomerans</i>             | 2             |
| <i>Pantoea sp.</i>                     | 1             |
| <i>Moraxella osloensis</i>             | 1             |
| <i>Proteus mirabilis</i>               | 2             |
| <i>Proteus vulgaris</i>                | 1             |
| <i>Pseudomonas aeruginosa</i>          | 1             |
| <i>Pseudomonas putida</i>              | 2             |
| <i>Pseudomonas graminis</i>            | 1             |
| <i>Pseudomonas fulva</i>               | 1             |
| <i>Psychrobacter sanguinis</i>         | 2             |
| <i>Psychrobacter pulmonis</i>          | 1             |
| <i>Serratia marcescens</i>             | 1             |
| <i>Serratia liquefaciens</i>           | 1             |
| <i>Stenotrophomonas maltophilia</i>    | 1             |
| Gram-positive                          | 57 (56.44)    |
| <i>Bacillus pumilus</i>                | 1             |
| <i>Enterococcus avium</i>              | 1             |
| <i>Enterococcus faecalis</i>           | 9             |
| <i>Enterococcus faecium</i>            | 3             |
| <i>Enterococcus hirae</i>              | 2             |
| <i>Lysinibacillus fusiformis</i>       | 1             |
| <i>Macrococcus canis</i>               | 1             |
| <i>Micrococcus luteus</i>              | 1             |
| <i>Microbacterium maritypicum</i>      | 1             |
| <i>Microbacterium oxydans</i>          | 1             |
| <i>Microbacterium paraoxydans</i>      | 1             |
| <i>Peribacillus simplex</i>            | 1             |
| <i>Sporosarcina luteola</i>            | 1             |
| <i>Staphylococcus aureus</i>           | 4             |
| <i>Staphylococcus capitis</i>          | 1             |
| <i>Staphylococcus cohnii</i>           | 1             |
| <i>Staphylococcus devriesei</i>        | 1             |
| <i>Staphylococcus condimentii</i>      | 1             |
| <i>Staphylococcus felis</i>            | 1             |
| <i>Staphylococcus haemolyticus</i>     | 1             |
| <i>Staphylococcus pasteurii</i>        | 1             |
| <i>Staphylococcus lentus</i>           | 1             |
| <i>Staphylococcus pseudintermedius</i> | 12            |

|                                     |   |
|-------------------------------------|---|
| <i>Staphylococcus schleiferi</i>    | 2 |
| <i>Staphylococcus saprophyticus</i> | 1 |
| <i>Staphylococcus warneri</i>       | 1 |
| <i>Staphylococcus sciuri</i>        | 1 |
| <i>Streptococcus canis</i>          | 4 |

---
